# Supplementary material
Source: PubMed Central journal article supplement (PMC3716069)
Supplement: JCM.03259-12_zjm999092526so1.pdf [file JCM.03259-12_zjm999092526so1.pdf]

Supplementary Table 1 – Comparison between the identification performance of using the MALDI Sepsityper and In-house extraction method in both MALDI-TOF MS systems (n=92)

| Conventional bacterial identification<br>(no. of strains) | MALDI Sepsityper method |                  |               |                |                  |                | In-house extraction method |                  |               |                |                  |                |
|-----------------------------------------------------------|-------------------------|------------------|---------------|----------------|------------------|----------------|----------------------------|------------------|---------------|----------------|------------------|----------------|
|                                                           | Biotyper                |                  |               | VITEK-MS       |                  |                | Biotyper                   |                  |               | VITEK-MS       |                  |                |
|                                                           | Species level           | Genus level only | No/ Wrong ID  | Species level  | Genus level only | No/ Wrong ID   | Species level              | Genus level only | No/ Wrong ID  | Species level  | Genus level only | No/ Wrong ID   |
| <b>Gram Positive Bacteria</b>                             |                         |                  |               |                |                  |                |                            |                  |               |                |                  |                |
| <i>Bacillus licheniformis</i> (1)                         | 0                       | 0                | 1             | 0              | 0                | 1              | 0                          | 0                | 1             | 0              | 0                | 1              |
| <i>Enterococcus avium</i> (1)                             | 1                       | 0                | 0             | 1              | 0                | 0              | 1                          | 0                | 0             | 1              | 0                | 0              |
| <i>Enterococcus faecalis</i> (2)                          | 2                       | 0                | 0             | 2              | 0                | 0              | 1                          | 1                | 0             | 2              | 0                | 0              |
| <i>Enterococcus faecium</i> (5)                           | 5                       | 0                | 0             | 5              | 0                | 0              | 5                          | 0                | 0             | 5              | 0                | 0              |
| <i>Staphylococcus aureus</i> (4)                          | 4                       | 0                | 0             | 3              | 0                | 1              | 2                          | 2                | 0             | 2              | 0                | 2              |
| <i>Staphylococcus capitis</i> (1)                         | 1                       | 0                | 0             | 0              | 1                | 0              | 1                          | 0                | 0             | 1              | 0                | 0              |
| <i>Staphylococcus epidermidis</i> (6)                     | 1                       | 4                | 1             | 2              | 0                | 4              | 1                          | 4                | 1             | 3              | 0                | 3              |
| <i>Staphylococcus hominis</i> (1)                         | 1                       | 0                | 0             | 1              | 0                | 0              | 0                          | 1                | 0             | 1              | 0                | 0              |
| <i>Streptococcus agalactiae</i> (2)                       | 2                       | 0                | 0             | 2              | 0                | 0              | 2                          | 0                | 0             | 2              | 0                | 0              |
| <i>Streptococcus sanguinis</i> (1)                        | 0                       | 1                | 0             | 1              | 0                | 0              | 1                          | 0                | 0             | 1              | 0                | 0              |
| <i>Listeria monocytogenes</i> (1)                         | 1                       | 0                | 0             | 1              | 0                | 0              | 1                          | 0                | 0             | 1              | 0                | 0              |
| <b>Sub-total (25)</b>                                     | <b>18</b>               | <b>5</b>         | <b>2</b>      | <b>18</b>      | <b>1</b>         | <b>6</b>       | <b>15</b>                  | <b>8</b>         | <b>2</b>      | <b>19</b>      | <b>0</b>         | <b>6</b>       |
|                                                           | <b>(72.0%)</b>          | <b>(20.0%)</b>   | <b>(8.0%)</b> | <b>(72.0%)</b> | <b>(4.0%)</b>    | <b>(24.0%)</b> | <b>(60.0%)</b>             | <b>(32.0%)</b>   | <b>(8.0%)</b> | <b>(76.0%)</b> | <b>(0%)</b>      | <b>(24.0%)</b> |
| <b>Gram Negative Bacteria</b>                             |                         |                  |               |                |                  |                |                            |                  |               |                |                  |                |
| <i>Acinetobacter baumannii</i> (2)                        | 0                       | 2                | 0             | 0              | 1                | 1              | 1                          | 1                | 0             | 2              | 0                | 0              |
| <i>Acinetobacter junii</i> (1)                            | 0                       | 0                | 1             | 0              | 0                | 1              | 1                          | 0                | 0             | 0              | 0                | 1              |
| <i>Aeromonas hydrophila</i> (1)                           | 0                       | 1                | 0             | 0              | 1                | 0              | 0                          | 1                | 0             | 0              | 1                | 0              |
| <i>Brevundimonas diminuta</i> (1)                         | 0                       | 0                | 1             | 0              | 0                | 1              | 0                          | 0                | 1             | 0              | 0                | 1              |
| <i>Citrobacter freundii</i> (2)                           | 2                       | 0                | 0             | 1              | 1                | 0              | 2                          | 0                | 0             | 0              | 1                | 1              |
| <i>Escherichia coli</i> (38)                              | 38                      | 0                | 0             | 38             | 0                | 0              | 38                         | 0                | 0             | 37             | 0                | 1              |
| <i>Enterobacter aerogenes</i> (4)                         | 4                       | 0                | 0             | 4              | 0                | 0              | 4                          | 0                | 0             | 4              | 0                | 0              |
| <i>Enterobacter kobei</i> (2)                             | 1                       | 1                | 0             | 0              | 2                | 0              | 1                          | 1                | 0             | 0              | 2                | 0              |
| <i>Klebsiella pneumoniae</i> (6)                          | 6                       | 0                | 0             | 6              | 0                | 0              | 5                          | 1                | 0             | 6              | 0                | 0              |
| <i>Proteus mirabilis</i> (2)                              | 2                       | 0                | 0             | 2              | 0                | 0              | 2                          | 0                | 0             | 2              | 0                | 0              |
| <i>Pseudomonas aeruginosa</i> (3)                         | 3                       | 0                | 0             | 3              | 0                | 0              | 3                          | 0                | 0             | 3              | 0                | 0              |
| <i>Salmonella enteritidis</i> (2)                         | 0                       | 2                | 0             | 0              | 2                | 0              | 0                          | 2                | 0             | 0              | 2                | 0              |
| <i>Serratia marcescens</i> (1)                            | 1                       | 0                | 0             | 1              | 0                | 0              | 1                          | 0                | 0             | 1              | 0                | 0              |
| <i>Stenotrophomonas maltophilia</i> (1)                   | 0                       | 0                | 1             | 0              | 0                | 1              | 1                          | 0                | 0             | 1              | 0                | 0              |
| <i>Vibrio vulnificus</i> (1)                              | 0                       | 0                | 1             | 0              | 0                | 1              | 0                          | 1                | 0             | 0              | 0                | 1              |
| <b>Sub-total (67)</b>                                     | <b>57</b>               | <b>6</b>         | <b>6</b>      | <b>55</b>      | <b>7</b>         | <b>5</b>       | <b>59</b>                  | <b>7</b>         | <b>1</b>      | <b>56</b>      | <b>6</b>         | <b>5</b>       |
|                                                           | <b>(85.1%)</b>          | <b>(9.0%)</b>    | <b>(9.0%)</b> | <b>(82.1%)</b> | <b>(10.4%)</b>   | <b>(7.5%)</b>  | <b>(88.1%)</b>             | <b>(10.4%)</b>   | <b>(1.5%)</b> | <b>(83.6%)</b> | <b>(9.0%)</b>    | <b>(7.5%)</b>  |
| <b>Total (92)</b>                                         | <b>75</b>               | <b>11</b>        | <b>6</b>      | <b>73</b>      | <b>8</b>         | <b>11</b>      | <b>74</b>                  | <b>15</b>        | <b>3</b>      | <b>75</b>      | <b>6</b>         | <b>11</b>      |
|                                                           | <b>(81.5%)</b>          | <b>(12.0%)</b>   | <b>(6.5%)</b> | <b>(79.3%)</b> | <b>(8.7%)</b>    | <b>(12.0%)</b> | <b>(80.4%)</b>             | <b>(16.3%)</b>   | <b>(3.3%)</b> | <b>(81.5%)</b> | <b>(6.5%)</b>    | <b>(12.0%)</b> |
